# Supplementary material for: Synthesis of a 2D Cu@TiO2 composite via the design of a 1D Cu-based coordination polymer precursor for efficient and selective photodegradation of dyes
Source: Royal Society of Chemistry journal article supplement (doi:10.1039/d1ra09309f), 2022-01-01
Supplement: d1ra09309f1.pdf [file d1ra09309f1.pdf]

Supplementary Material (ESI)

**Synthesis of a 2D Cu@TiO<sub>2</sub> composite via the design of a 1D Cu-based coordination polymer precursor for efficient and selective photodegradation of dyes**

Ya-Qian Zhang,<sup>a, c</sup> Ning Xu,<sup>a</sup> Yu Liu,<sup>a</sup> Xiao-Sa Zhang,<sup>a</sup> Wen-Ze Li<sup>a\*</sup>, Hong-Tian Zhao<sup>a</sup> and Jian Luan<sup>b\*</sup>

<sup>a</sup> College of Science, Shenyang University of Chemical Technology, Shenyang, 110142, P. R. China

<sup>b</sup> College of Sciences, Northeastern University, Shenyang, 100819, P. R. China

<sup>c</sup> College of Chemistry, Liaoning University, Shenyang 110036, P. R. China

E-mail: [liwenze@syuct.edu.cn](mailto:liwenze@syuct.edu.cn) (W. Z. Li); [2010044@stu.neu.edu.cn](mailto:2010044@stu.neu.edu.cn) (J. Luan)

**Table S1** Selected bond distances (Å) and angles (°) for complex **1**.

|                   |            |                    |            |
|-------------------|------------|--------------------|------------|
| Cu(1)–O(1)        | 1.9265(17) | Cu(1)–O(4)#1       | 1.9441(16) |
| Cu(1)–O(1W)       | 1.9489(16) | Cu(1)–N(1)         | 1.988(2)   |
| Cu(2)–O(8)#2      | 1.9581(17) | Cu(2)–O(3W)        | 1.9818(17) |
| Cu(2)–O(5)        | 1.9868(16) | Cu(2)–N(2)         | 2.029(2)   |
| Cu(2)–O(2W)       | 2.2214(18) | O(1)–Cu(1)–O(4)#1  | 165.73(8)  |
| O(1)–Cu(1)–O(1W)  | 89.36(7)   | O(4)#1–Cu(1)–O(1W) | 87.93(7)   |
| O(1)–Cu(1)–N(1)   | 91.43(7)   | O(4)#1–Cu(1)–N(1)  | 92.36(8)   |
| O(1W)–Cu(1)–N(1)  | 175.54(8)  | O(8)#2–Cu(2)–O(3W) | 89.79(7)   |
| O(8)#2–Cu(2)–O(5) | 179.73(8)  | O(3W)–Cu(2)–O(5)   | 90.47(7)   |
| O(8)#2–Cu(2)–N(2) | 89.28(7)   | O(3W)–Cu(2)–N(2)   | 171.84(8)  |
| O(5)–Cu(2)–N(2)   | 90.47(7)   | O(8)#2–Cu(2)–O(2W) | 90.46(7)   |
| O(3W)–Cu(2)–O(2W) | 89.66(7)   | O(5)–Cu(2)–O(2W)   | 89.49(7)   |
| N(2)–Cu(2)–O(2W)  | 98.45(8)   |                    |            |

Symmetry codes: #1  $x, y - 1, z$ ; #2  $x, y + 1, z$ .

## Supplementary Material (ESI)

**Table S2** Hydrogen bonding geometries (Å, °) of complex **1**.

| D–H···A                    | D–H  | H···A | D···A  | D–H···A |
|----------------------------|------|-------|--------|---------|
| N3–H3B···O5 <sup>a</sup>   | 0.86 | 2.17  | 3.0036 | 162     |
| O3W–H3WB···O3 <sup>b</sup> | 0.85 | 1.94  | 2.7628 | 162     |
| O2W–H2WA···O9 <sup>c</sup> | 0.85 | 2.14  | 2.7205 | 125     |

Symmetry codes: <sup>a</sup> 1 – x, –y, 1 – z; <sup>b</sup> x, –1 + y, –1 + z; <sup>c</sup> 1/2 + x, 1/2 – y, –1/2 + z.

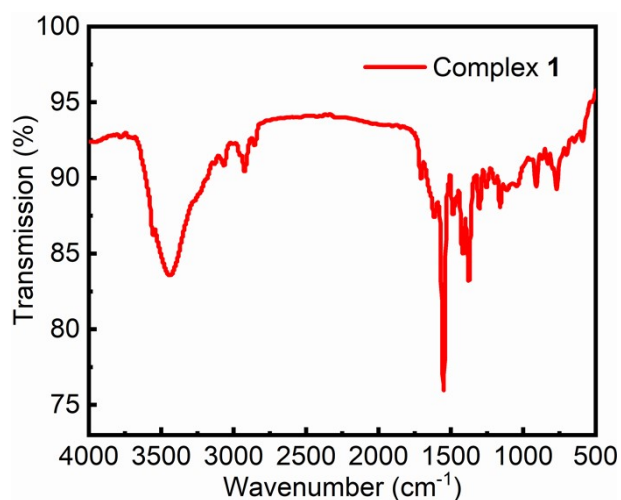

**Fig. S1** The IR spectrum of complex **1**.

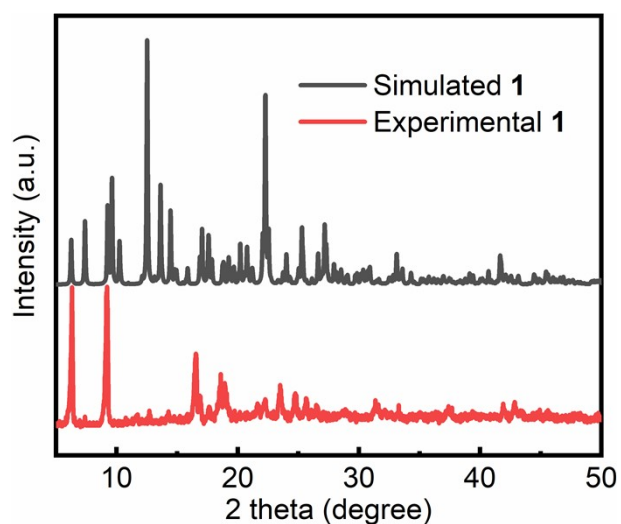

**Fig. S2** The PXRD patterns of simulated and fresh sample for complex **1**.

### Supplementary Material (ESI)

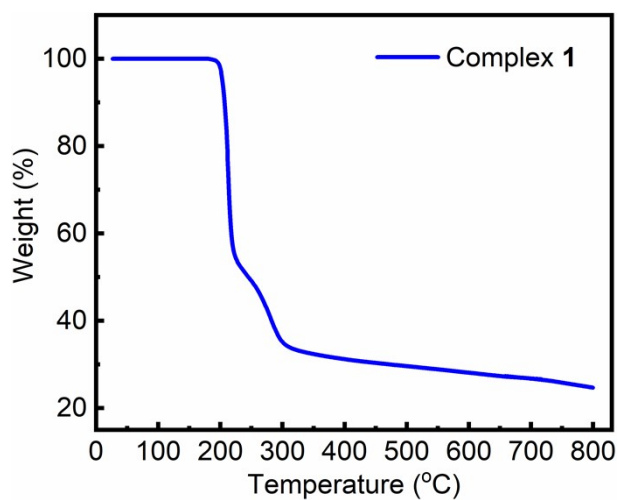

**Fig. S3** The TG curve of complex 1.

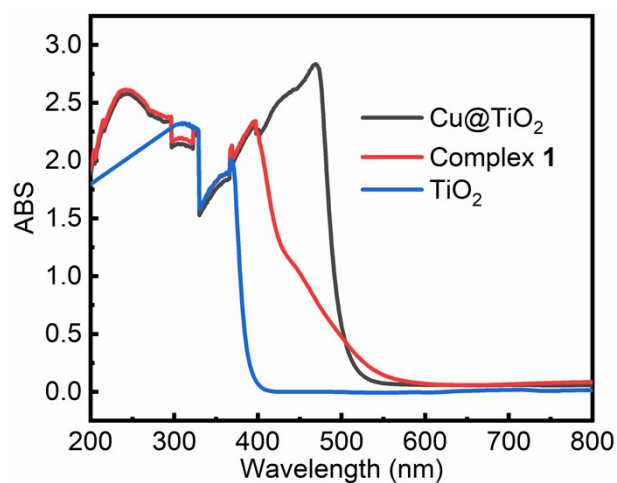

(a)

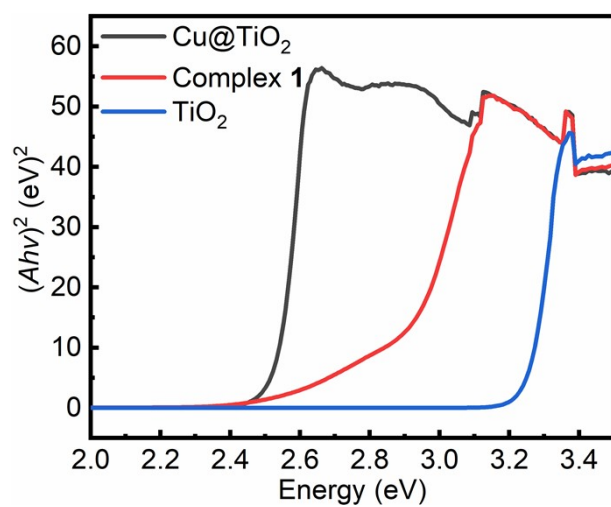

(b)

**Fig. S4** UV-vis diffuse-reflectance spectra (a) and Tauc plots of  $(Ah\nu)^2$  versus  $(h\nu)$  (b) of TiO<sub>2</sub>, complex 1, and Cu@TiO<sub>2</sub>, respectively.

## Supplementary Material (ESI)

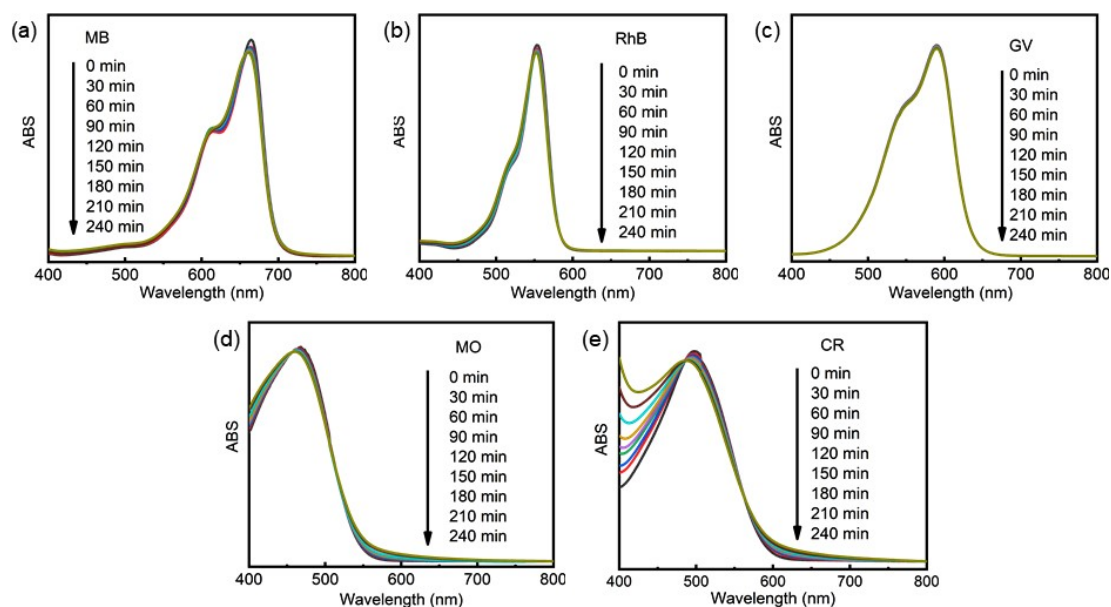

**Fig. S5** UV-vis spectra of MB (a), RhB (b), GV (c), MO (d), and CR (e) solutions which were recorded after photocatalytic degradation had been performed for different lengths of time without catalysts.

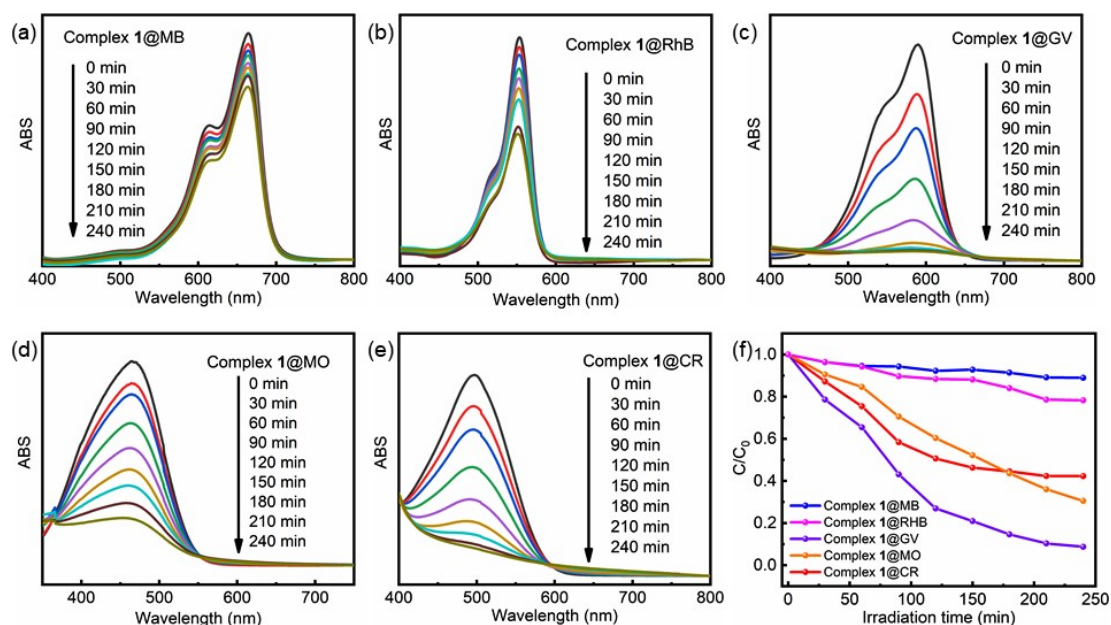

**Fig. S6** UV-vis spectra of MB (a), RhB (b), GV (c), MO (d), and CR (e) solutions which were recorded after photocatalytic degradation had been performed for different lengths of time with complex 1. (f) The photodegradation rates of MB, RhB, MO, CR and GV at different time points during exposure to complex 1.

## Supplementary Material (ESI)

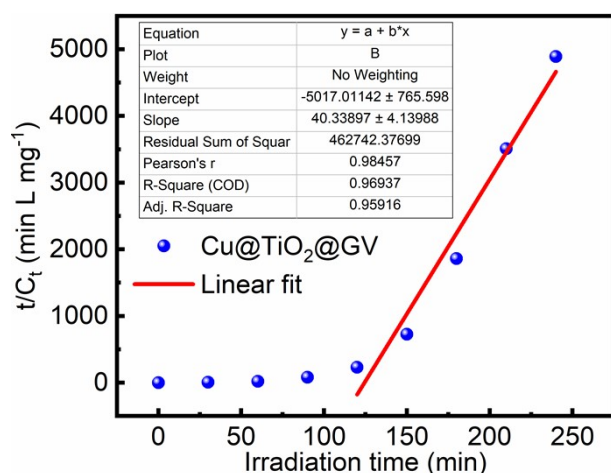

**Fig. S7** Pseudo-second-order plot with respect to time for Cu@TiO<sub>2</sub> in an aqueous GV solution for 90–240 min under UV irradiation. Equation:  $t/C_t = 1/(kC_0^2) + t/C_0$ , where  $C_0$  represents the initial concentration of GV (10 mg L<sup>-1</sup>),  $C_t$  is the residual concentration of GV at time  $t$  (min), and  $k$  denotes the pseudo-second-order rate constant (L mg<sup>-1</sup> min<sup>-1</sup>).

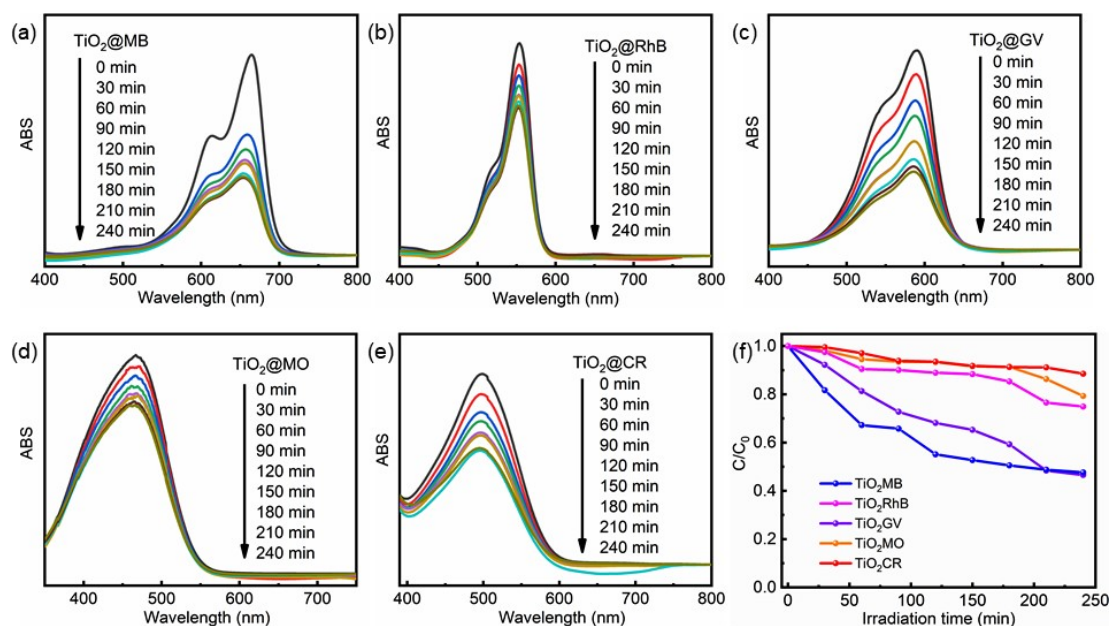

**Fig. S8** UV–vis spectra of MB (a), RhB (b), GV (c), MO (d), and CR (e) solutions which were recorded after photocatalytic degradation had been performed for different lengths of time with pure TiO<sub>2</sub>. (f) The photodegradation rates of MB, RhB, MO, CR and GV at different time points during exposure to pure TiO<sub>2</sub>.

## Supplementary Material (ESI)

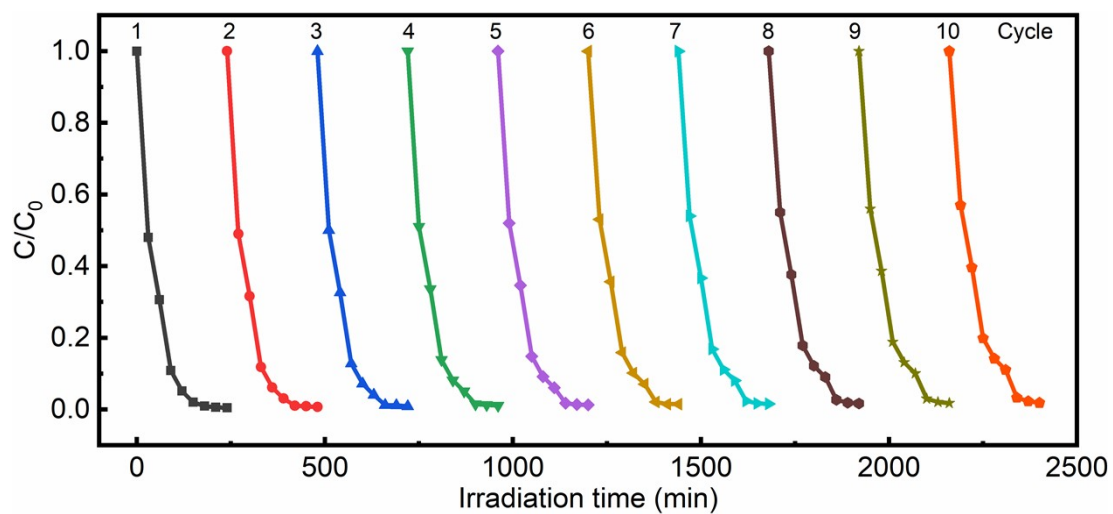

**Fig. S9** The cycling stability of the photocatalytic degradation of GV on the Cu@TiO<sub>2</sub>.

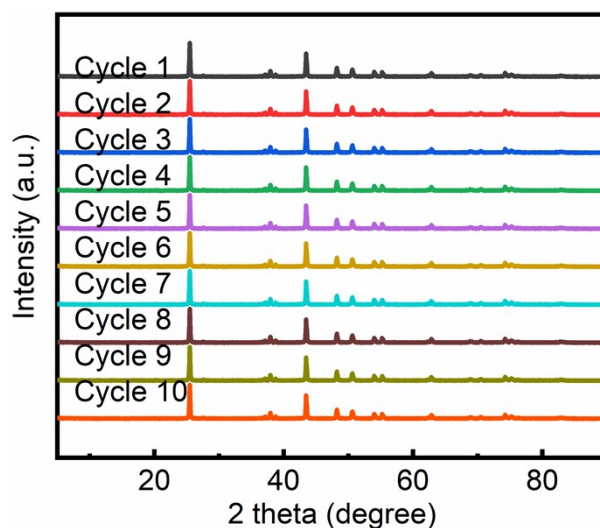

**Fig. S10** The XRD patterns of the cycling stability of the photocatalytic degradation of GV on the Cu@TiO<sub>2</sub>.
